# Supplementary material
Source: MDPI journal article supplement (https://www.mdpi.com/2075-4655/2/2/7)
Supplement: s1 [file s1]

Archive with 6 entries (6 files):
- Supplementary Figure S1. Chop-PCR analysis of viral DNA isolated from APTR+BetaPTR coinfiltrated plants.pdf
- Supplementary Figure S2. Chop-PCR analysis of viral DNA isolated from APTR alone infiltrated plants.pdf
- Supplementary Figure S3. MethGo analysis of Bisulfite NGS Data for C4 mutant APTR (C4MAPTR) alone infiltrated plant samples.pdf
- Supplementary Figure S4. MethGo analysis of Bisulfite NGS Data for C4MAPTR and a┬PTR coinfiltrated plant samples.pdf
- Supplementary Figure S5. MethGo analysis of Bisulfite NGS Data for C2 mutant APTR (C2MAPTR) alone infiltrated plant samples.pdf
- Supplementary Figure S6. MethGo analysis of Bisulfite NGS Data for C2MAPTR and a┬PTR coinfiltrated plant samples.pdf
