# Supplementary material
Source: MDPI journal article supplement (https://www.mdpi.com/2075-4655/2/2/7)
Supplement: s1 [file s1 › Supplementary Figure S1. Chop-PCR analysis of viral DNA isolated from APTR+BetaPTR coinfiltrated plants.pdf]

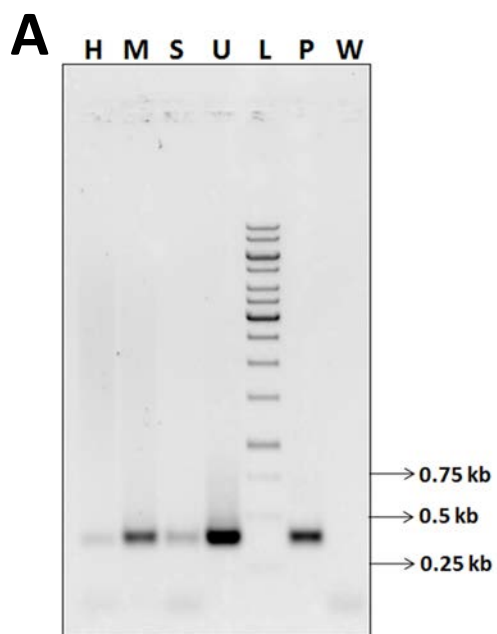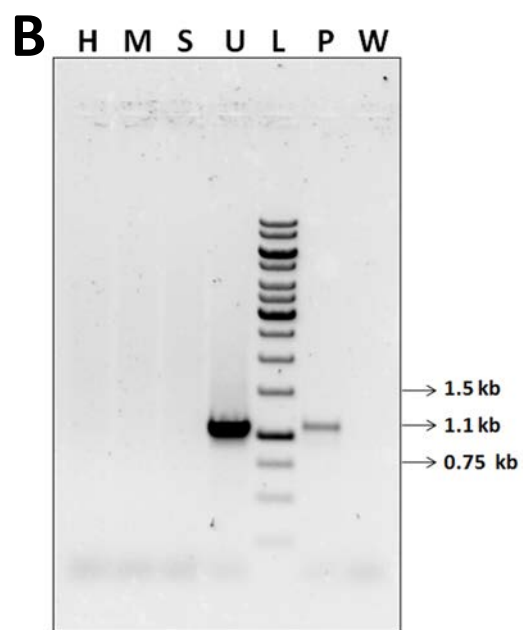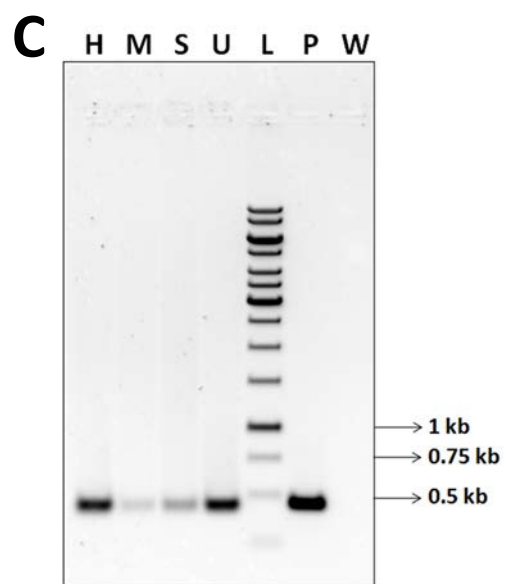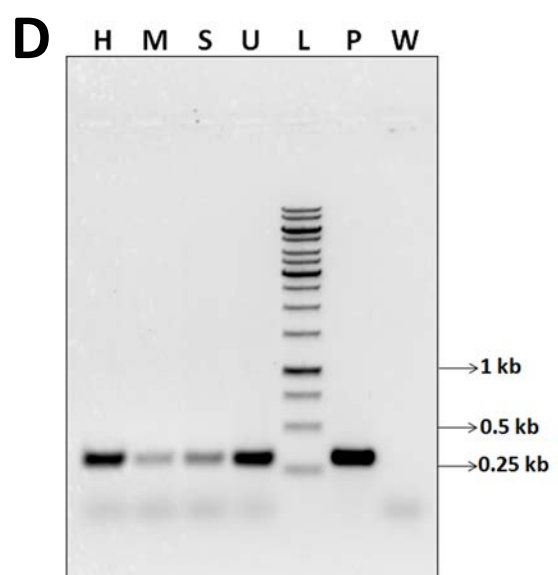

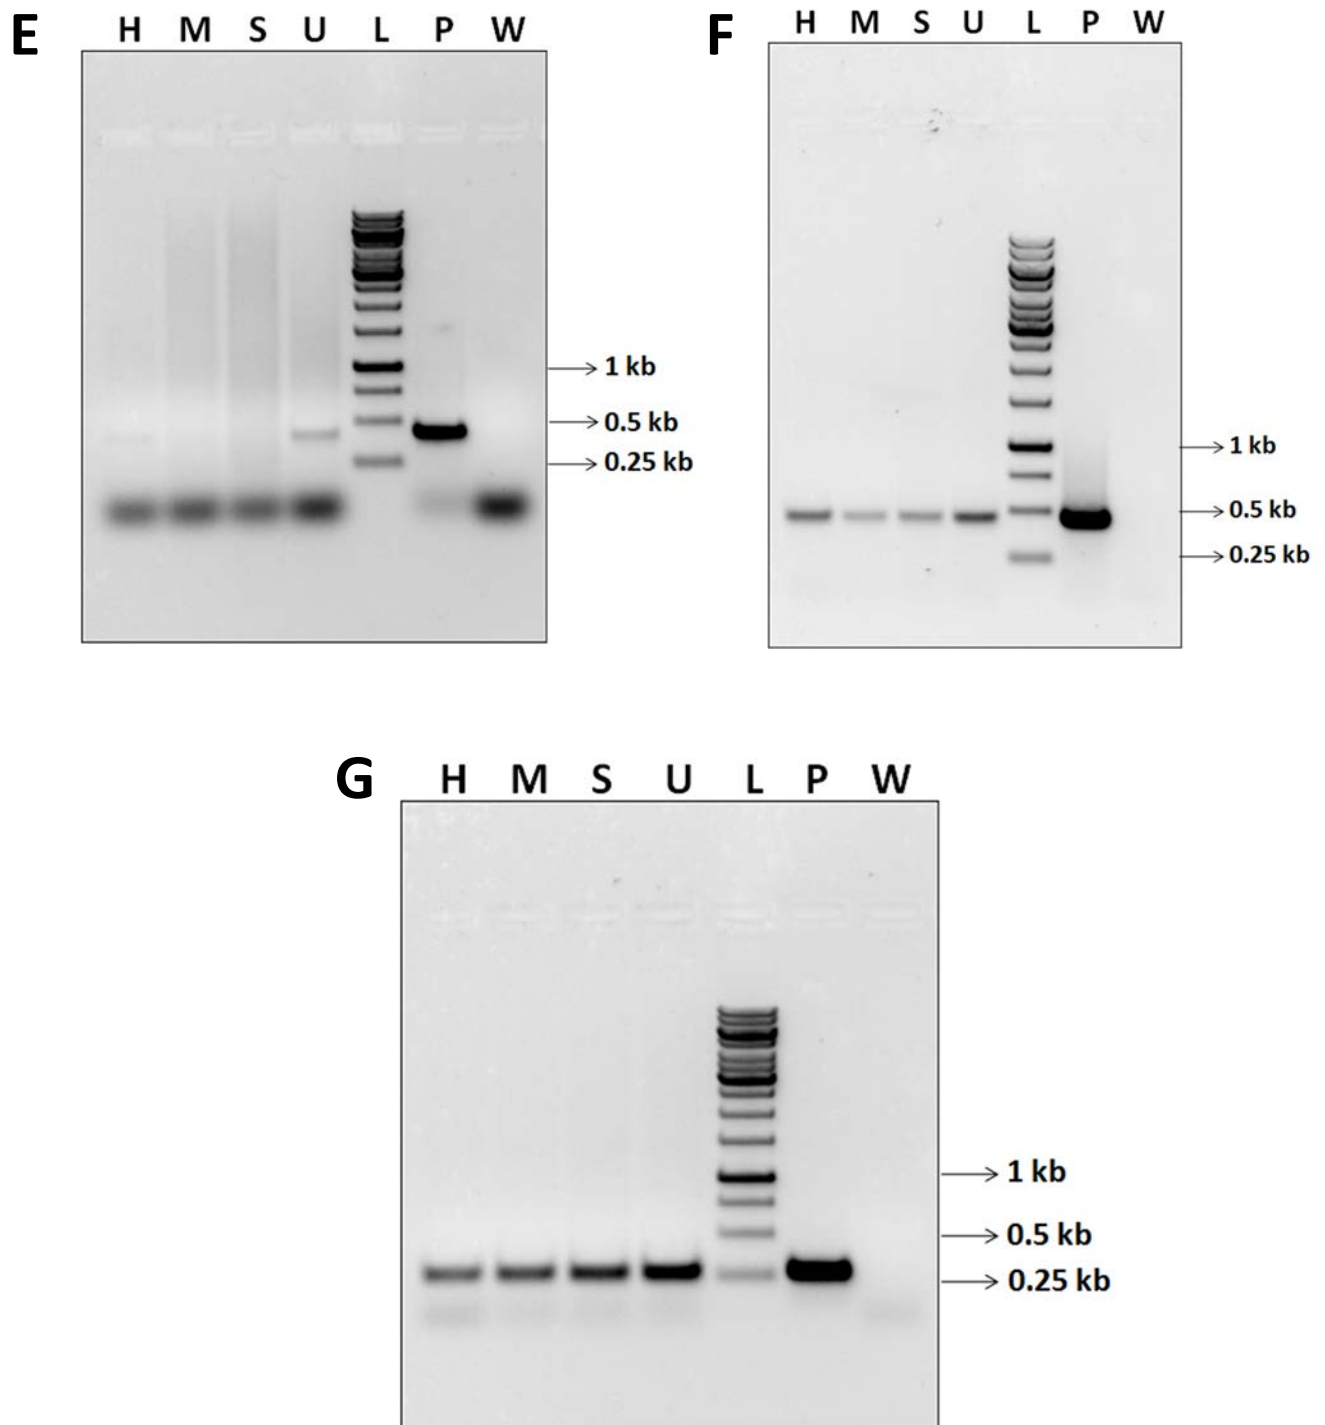

**Supplementary figure S1.** Methylation sensitive restriction enzymes (MSREs) digested viral DNA from APTR and  $\beta$ PTR co-infiltrated *N. benthamiana* plants subjected to PCR amplification with various primers V2 coding region (A) C4 forward and V2 reverse (B) C2 coding region (C) C4 coding region (D)  $\beta$ C1 coding region (E)  $\beta$ C1 upstream region (F) **BYVMV** intergenic region (IR) (G) showing different intensity of amplification. (H – *Hpa*II, M – *Mbo*I, S – *Sau*3AI digested viral DNA sample, U – PCR product from undigested viral DNA sample, L – 1 kb ladder, P – positive control (PCR product from pBKS APTR or pGEMT-Beta DNA), W – Water control).
