# Supplementary material
Source: MDPI journal article supplement (https://www.mdpi.com/2075-4655/2/2/7)
Supplement: s1 [file s1 › Supplementary Figure S2. Chop-PCR analysis of viral DNA isolated from APTR alone infiltrated plants.pdf]

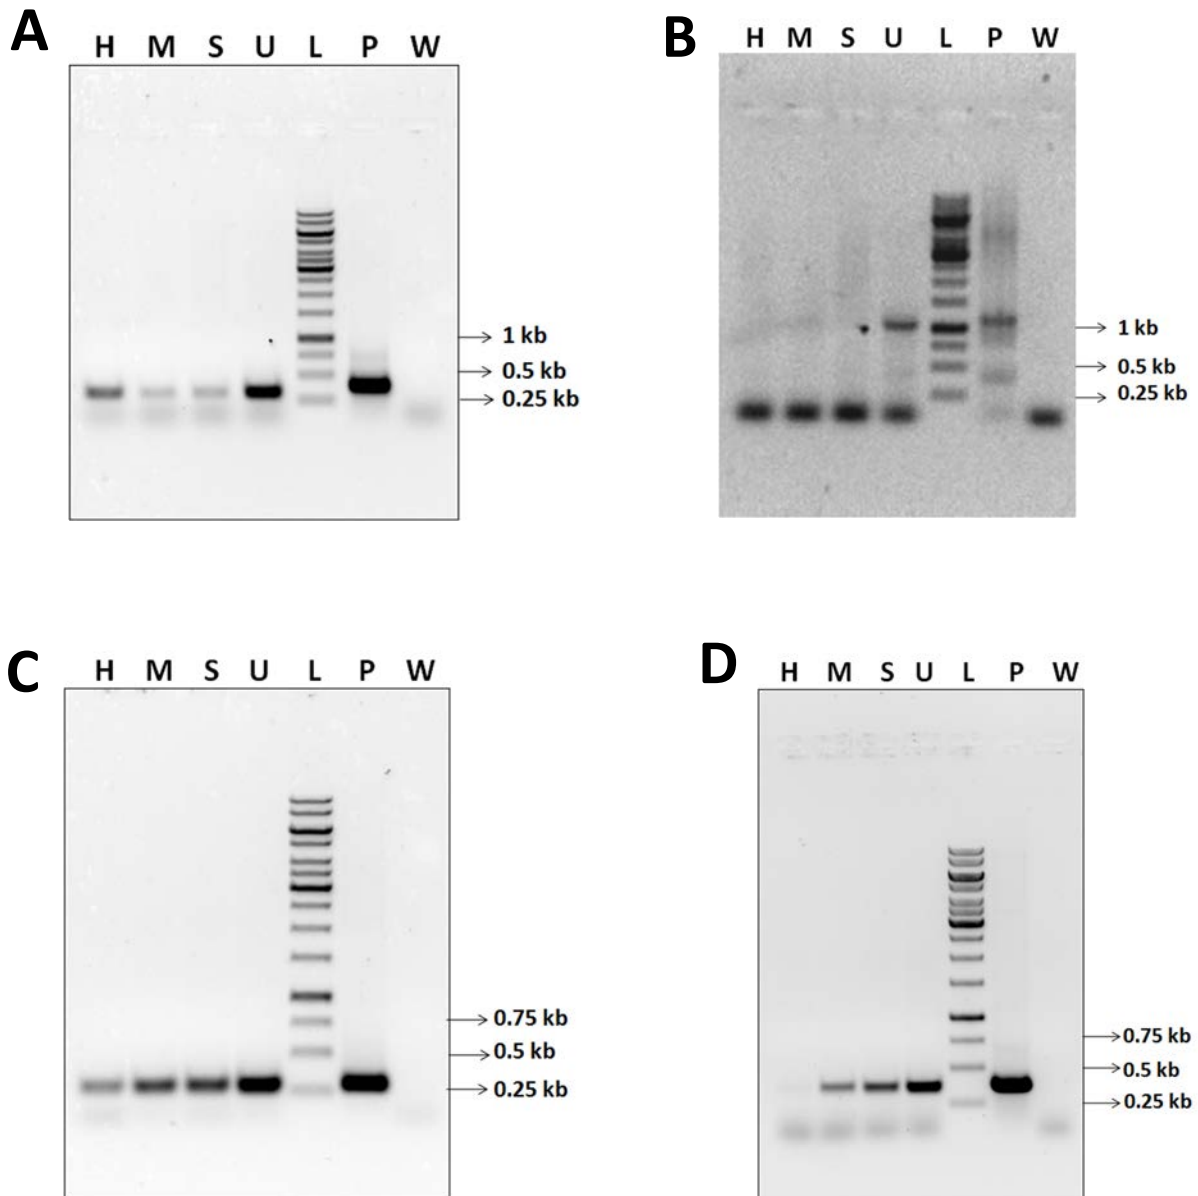

**Supplementary figure S2.** MSREs digested viral DNA from APTR alone infiltrated *N. benthamiana* plants subjected to PCR amplification with various primers C4 forward and reverse (A), C4 forward and V2 reverse (Amplifies the promoter region in between C4 and V2 ORFs) (B), **BYVMV** intergenic region (IR) (C), V2 coding region (D), showing different intensity of amplification. (H – *Hpa*II, M – *Mbo*I, S – *Sau*3AI digested viral DNA sample, U – PCR product from undigested viral DNA sample, L – 1 kb ladder, P – Positive control (PCR product from pBKS APTR), W – Water control).
