# Supplementary material
Source: MDPI journal article supplement (https://www.mdpi.com/2075-4655/2/2/7)
Supplement: s1 [file s1 › Supplementary Figure S3. MethGo analysis of Bisulfite NGS Data for C4 mutant APTR (C4MAPTR) alone infiltrated plant samples.pdf]

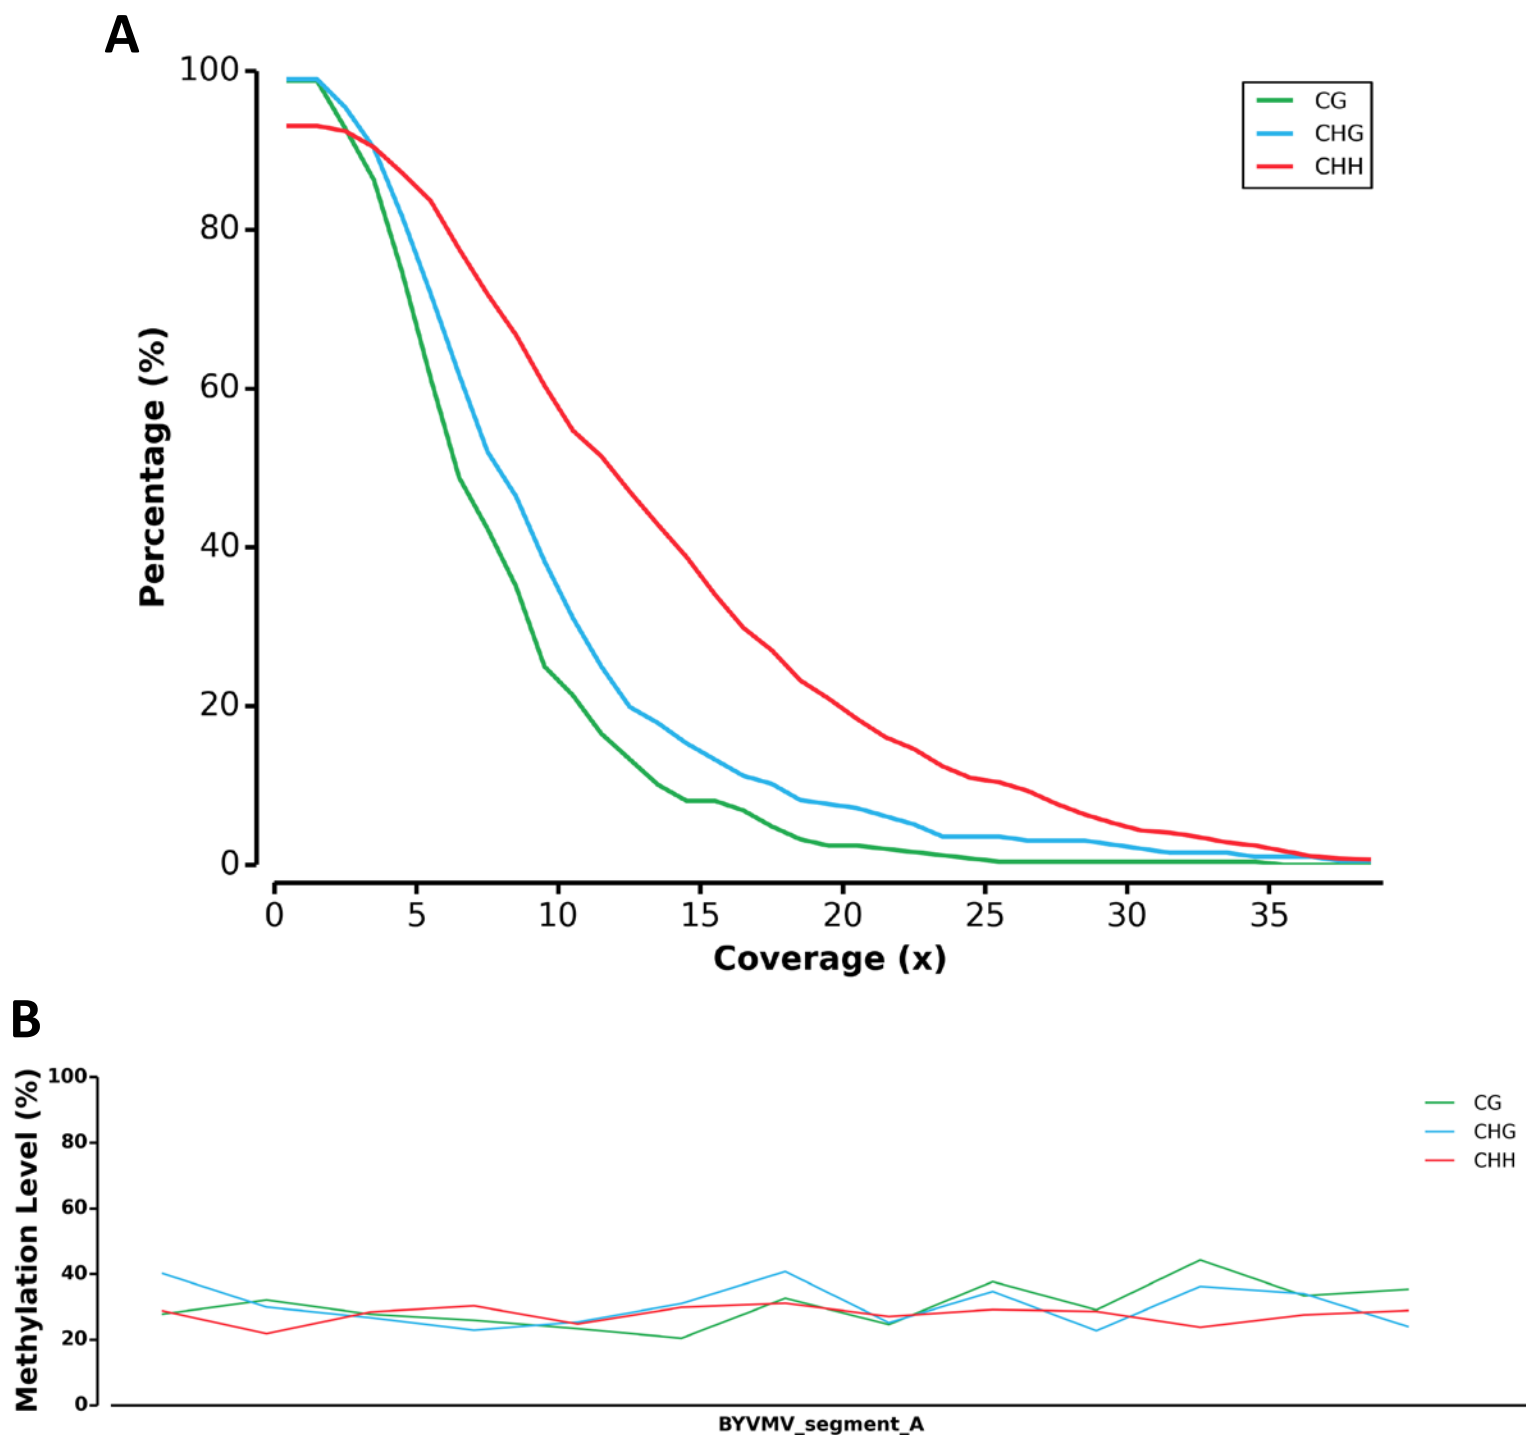

**Supplementary Figure S3. MethGo analysis of Bisulfite NGS Data for C4 mutant APTR (C4MAPTR) alone infiltrated plant samples:** **A)** Coverage map of ~2.6 million bisulfite NGS reads from C4MAPTR alone infiltrated plant sample. Y-axis represents the percentage of methylation sites covered in the C4 mutant **BYVMV**. X- axis represents the depth of coverage (X) in multiples of thousand. High coverage (X) indicates high reliability of data. **B)** The genome wide methylation map of BYVMV showing the level of methylation at different regions of C4 mutant **BYVMV**.
