# Supplementary material
Source: MDPI journal article supplement (https://www.mdpi.com/2075-4655/2/2/7)
Supplement: s1 [file s1 › Supplementary Figure S5. MethGo analysis of Bisulfite NGS Data for C2 mutant APTR (C2MAPTR) alone infiltrated plant samples.pdf]

# MethGo analysis of Bisulfite NGS Data for C2 mutant APTR (C2MAPTR) alone infiltrated plant samples

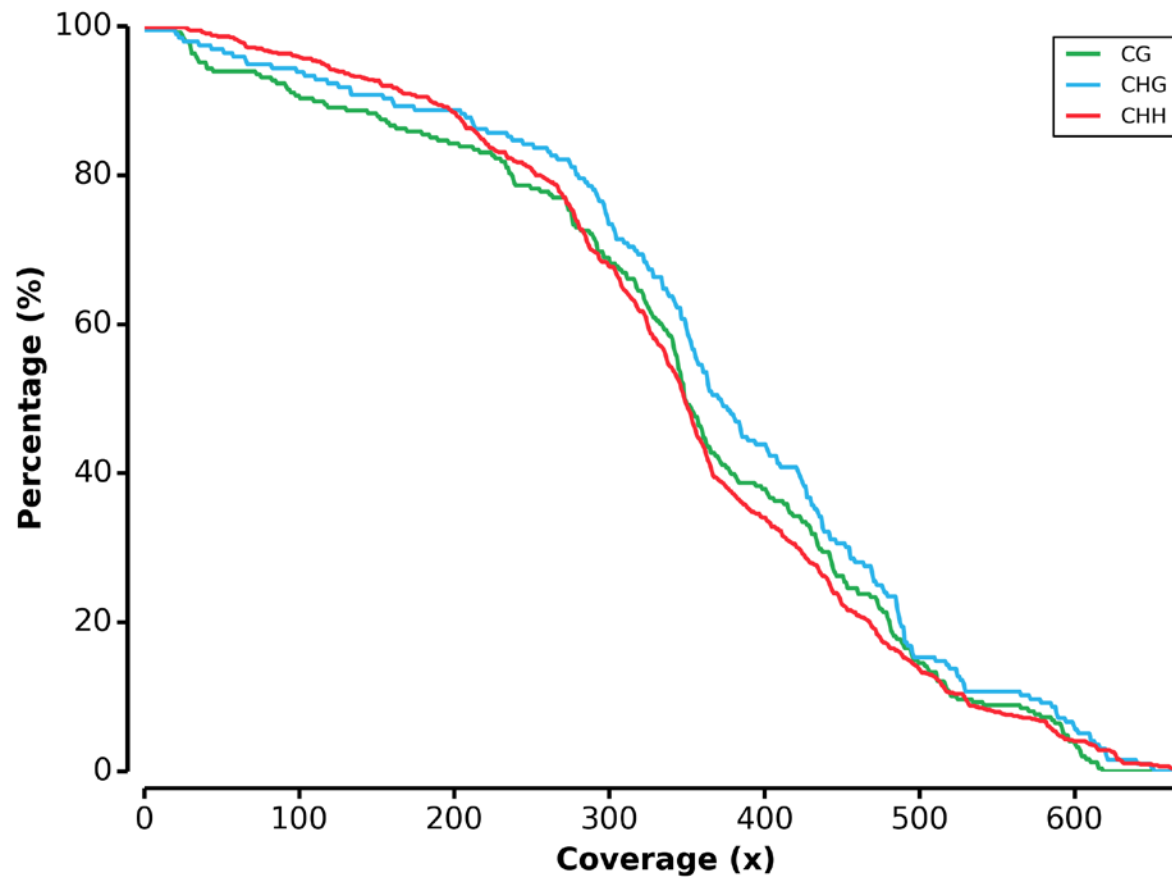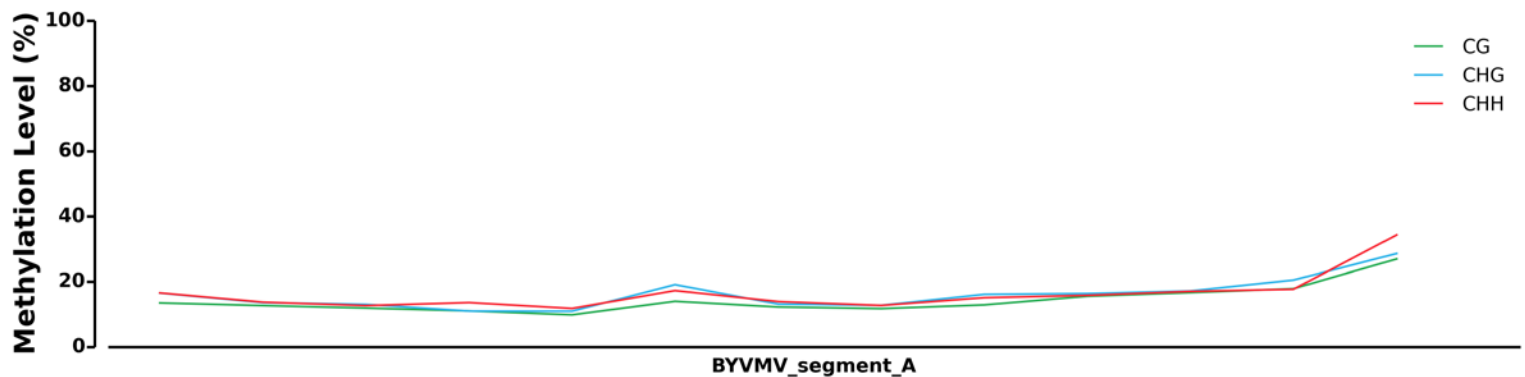

**Supplementary Figure S5. MethGo analysis of Bisulfite NGS Data for C2 mutant APTR (C2MAPTR) alone infiltrated plant samples:** A) Coverage map of ~2.8 million bisulfite NGS reads from C2MAPTR alone infiltrated plant sample. Y-axis represents the percentage of methylation sites covered in the **BYVMV** C2 mutant. X- axis represents the depth of coverage (X) in multiples of thousand. B) The genome-wide methylation map of BYVMV showing the level of methylation at different regions of C2 mutant **BYVMV**.
