# Supplementary material
Source: MDPI journal article supplement (https://www.mdpi.com/2075-4655/2/2/7)
Supplement: s1 [file s1 › Supplementary Figure S6. MethGo analysis of Bisulfite NGS Data for C2MAPTR and a┬PTR coinfiltrated plant samples.pdf]

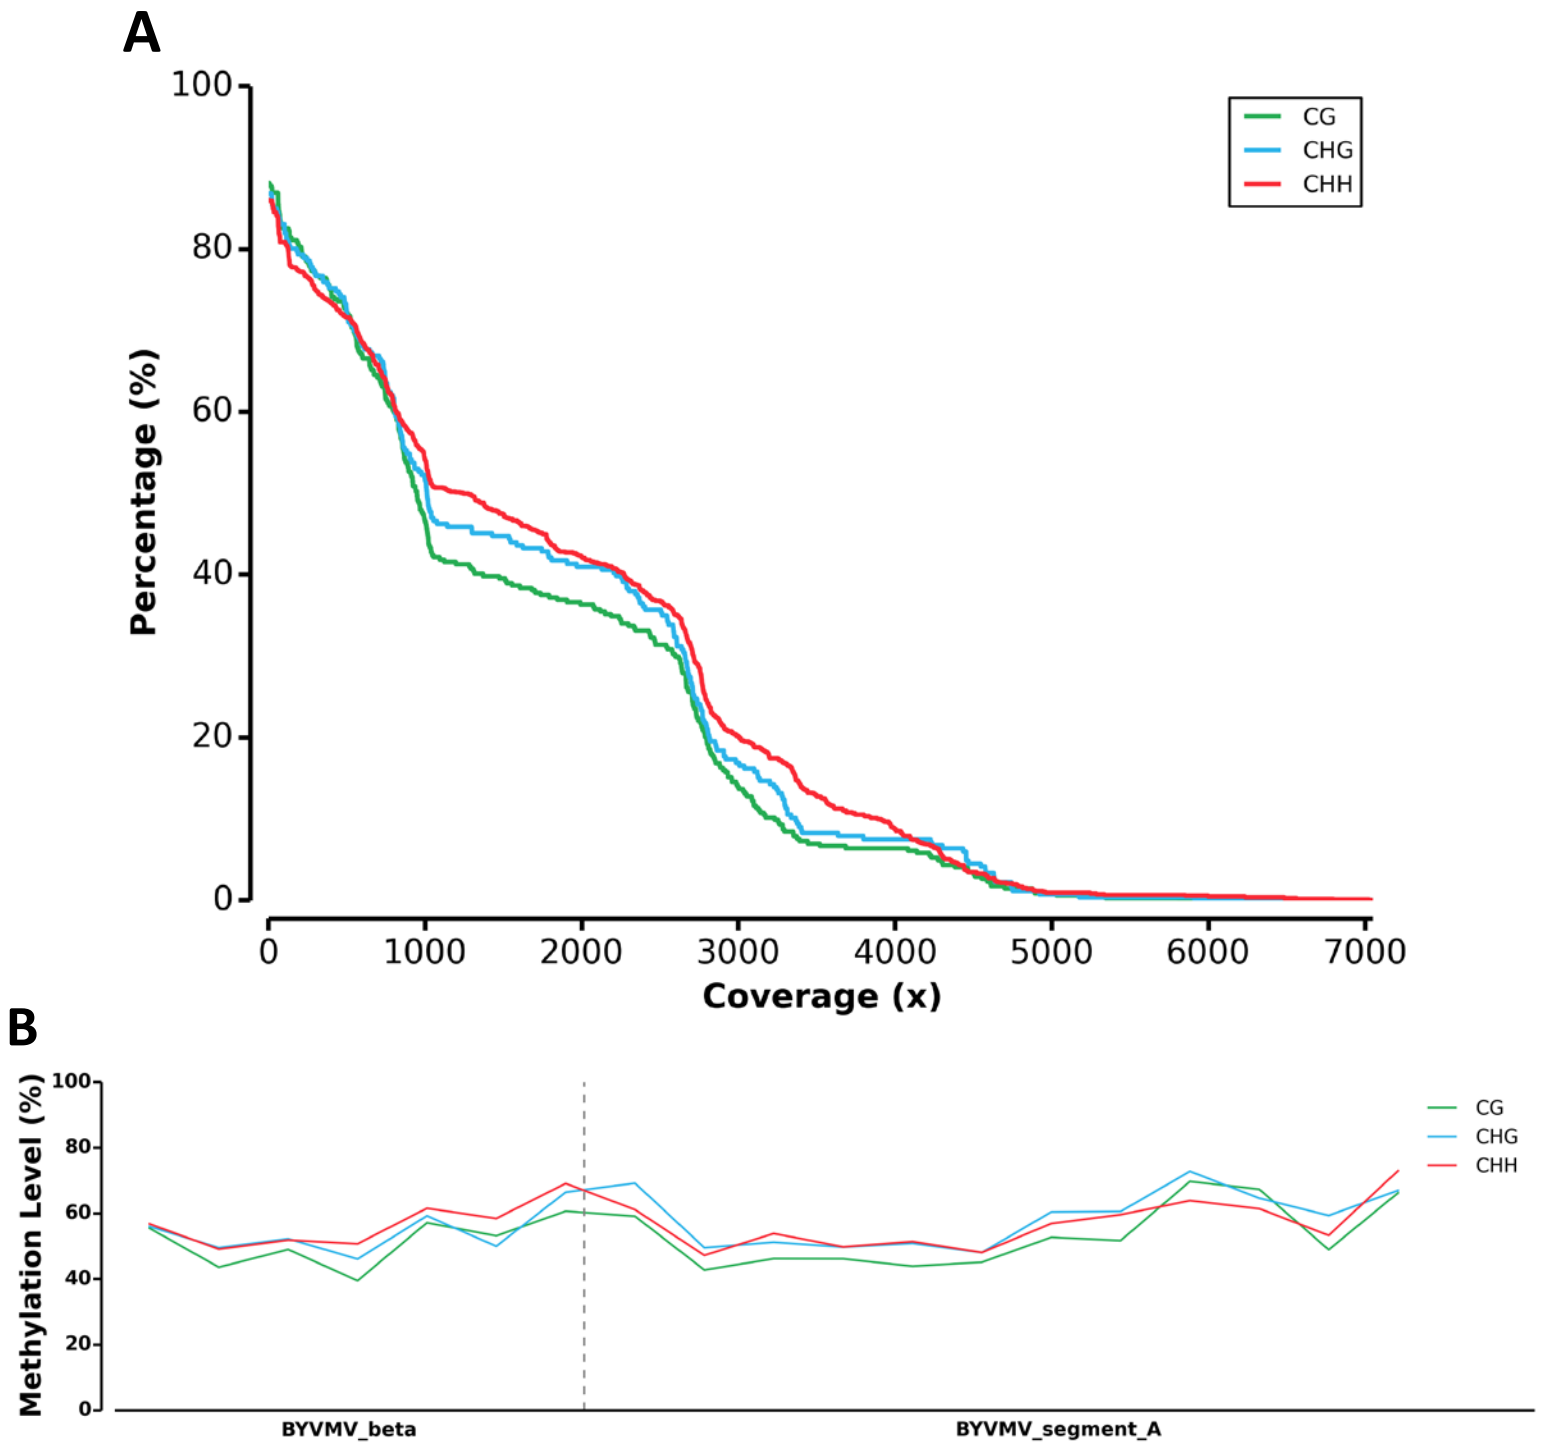

**Supplementary figure S6. MethGo analysis of bisulfite NGS data for C2MAPTR and  $\beta$ PTR coinfiltrated plant samples:** A) Coverage map of ~3.2 million bisulfite NGS reads from C2MAPTR+ $\beta$ PTR co-infiltrated plant sample. Y-axis represents the percentage of methylation sites covered in the genome. X-axis represents the depth of coverage (X) in multiples of fifty. B) The genome-wide methylation map showing the level of methylation at different regions of C2 mutant **BYVMV** and betasatellite.
